# Supplementary material
Source: publisher figshare collection journal article supplement (https://tandf.figshare.com/ndownloader/files/20133881)
Supplement: Supplementary file 1 [file 20133881]

## Supplementary Material

DOI: 10.2989/00306525.2019.1662508

*Ostrich: Journal of African Ornithology* 2019, 90(4)

### Ecology, conservation, and phylogenetic position of the Madagascar Jacana *Actophilornis albinucha*

D'Urban Jackson, Zefania, Moehy, Bamford, Bruford and Székely

**Table S1:** Lakes visited from January to October in 2016 to survey the Madagascar Jacana *Actophilornis albinucha* and their presence. Long. = degrees longitude; Lat. = degrees latitude. Reported sightings of Madagascar Jacana prior to the surveys are also indicated, in addition to lakes where water hyacinth dominated the wetland at the time of surveying

| Site             | Town/city/lake complex | Long. | Lat.   | Month of survey | Jacana sightings reported | Present = 1<br>Absent = 0 | Total no. of individuals | Dominant Water Hyacinth |
|------------------|------------------------|-------|--------|-----------------|---------------------------|---------------------------|--------------------------|-------------------------|
| Lake Anjanjany   | Ambolobozobe           | 49.54 | -12.55 | October         |                           | 0                         | NA                       | X                       |
| Lake Ambia       | Ambolobozobe           | 49.51 | -12.54 | October         |                           | 0                         | NA                       |                         |
| Lake Matsaboribe | Ambolobozobe           | 49.48 | -12.54 | October         |                           | 0                         | NA                       |                         |
| Lake Papan'i JAO | Ambolobozobe           | 49.53 | -12.53 | October         |                           | 0                         | NA                       |                         |
| Lake Maivadoany  | Sahaka                 | 49.90 | -13.15 | September       | X                         | 0                         | NA                       |                         |

|                                                                             |                      |       |        |           |   |   |    |   |
|-----------------------------------------------------------------------------|----------------------|-------|--------|-----------|---|---|----|---|
| <b>Lake Andohanampagnasy</b>                                                | Sahaka               | 49.90 | -13.12 | September | X | 0 | NA |   |
| <b>Lake Andohazavy</b>                                                      | Sahaka               | 49.91 | -13.12 | September | X | 0 | NA |   |
| <b>Lake Mitohitohy</b>                                                      | Ampagnisa Ampisikina | 49.74 | -12.82 | October   |   | 0 | NA |   |
| <b>Lake Andranovorilava</b>                                                 | Ampagnisa Ampisikina | 49.73 | -12.80 | October   |   | 0 | NA |   |
| <b>Lake around Ambanja</b>                                                  | Ambanja              | 48.45 | -13.67 | October   |   | 0 | NA |   |
| <b>Lakes beside the national road between Port-Berger and Antsohihy</b>     | Antsohihy            | 47.88 | -15.33 | February  |   | 0 | NA |   |
| <b>Lake Tsinjomitondraka North</b>                                          | Port-Berger          | 47.12 | -15.66 | October   |   | 0 | NA | X |
| <b>Unknown name</b>                                                         | Port-Berger          | 47.11 | -15.64 | October   | X | 0 | NA |   |
| <b>Lake Kinkony</b>                                                         | Mitsinjo             | 45.91 | -16.15 |           | X | 0 | NA |   |
| <b>Lake Amboromalandy</b>                                                   | Amboromalandy        | 46.76 | -16.13 | February  | X | 0 | NA | X |
| <b>Lakes beside the national road between Port-Berger and Mampikony</b>     | Port-Berger          | 47.62 | -15.57 | February  | X | 0 | NA |   |
| <b>Lakes beside the national road between Matsaborilava and Port-Berger</b> | Tsarahasina          | 47.58 | -15.77 | February  | X | 0 | NA |   |
| <b>Lakes beside the national road from Mampikony to Amboromalandy</b>       | Mampikony            | 47.65 | -16.83 | February  |   | 0 | NA | X |
| <b>Lake Andranolava</b>                                                     | Masoarivo            | 44.41 | -19.10 | January   | X | 0 | NA |   |
| <b>Lake Antsamaky</b>                                                       | Masoarivo            | 44.36 | -19.04 | January   | X | 0 | NA |   |
| <b>Lake Ankerika</b>                                                        | Masoarivo            | 44.45 | -19.02 | January   | X | 0 | NA |   |
| <b>Lake Ankilizato North</b>                                                | Ankilizato           | 43.25 | -22.11 | June      |   | 0 | NA |   |
| <b>Lake Ambondro</b>                                                        | Ankilizato           | 45.02 | -20.42 | June      |   | 0 | NA |   |
| <b>Lake Croisement Beiky</b>                                                | Ankilizato           | 45.04 | -20.41 | June      |   | 0 | NA |   |
| <b>Lake Angodogodo</b>                                                      | Ankilizato           | 45.04 | -20.41 | June      |   | 0 | NA |   |
| <b>Lake Mavogisa</b>                                                        | Ankilizato           | 45.02 | -20.41 | June      |   | 0 | NA |   |
| <b>Lake Ambaibolava</b>                                                     | Malaimbandy          | 45.63 | -20.34 | July      |   | 0 | NA | X |
| <b>Lake Andriamondra</b>                                                    | Soatanimbary         | 45.55 | -20.15 | July      |   | 0 | NA |   |
| <b>Lake Sirave</b>                                                          | Kirindy Mite         | 43.90 | -20.90 |           | X | 0 | NA |   |
| <b>Lake Ambondro</b>                                                        | Kirindy Mite         | 43.90 | -20.89 |           | X | 0 | NA |   |

|                                    |                         |       |        |           |   |    |     |   |
|------------------------------------|-------------------------|-------|--------|-----------|---|----|-----|---|
| <b>Lake Andasakoa</b>              | Ihotry                  | 43.64 | -22.02 | August    | X | 0  | NA  |   |
| <b>Lake Andramagnobe</b>           | Ihotry                  | 43.59 | -21.89 | August    | X | 0  | NA  |   |
| <b>Lake Anosy</b>                  | Sahaka                  | 49.90 | -13.14 | September | X | 1  | 2   |   |
| <b>Lake Ambinagny</b>              | Sahaka                  | 49.96 | -13.13 | September | X | 1  | 1   |   |
| <b>Lake Matsaborilava</b>          | Tsarahasina-Port-Berger | 47.56 | -15.76 | February  | X | 1  | 3   |   |
| <b>Lake Tsinjomitondraka South</b> | Port-Berger             | 47.12 | -15.67 | October   | X | 1  | 13  | X |
| <b>Lake Madiromilomboka</b>        | Amboromalandy           | 46.77 | -16.15 | October   | X | 1  | 4   | X |
| <b>Lake Ampisaraha</b>             | Amboromalandy           | 46.76 | -16.14 | October   | X | 1  | 2   | X |
| <b>Lake Marogoaky</b>              | Amboromalandy           | 46.77 | -16.14 | October   | X | 1  | 8   | X |
| <b>Lake Bejio Est</b>              | Mandrozo                | 44.12 | -17.57 | September | X | 1  | 7   |   |
| <b>Lake Bejio Ouest</b>            | Mandrozo                | 44.11 | -17.57 | September | X | 1  | 3   |   |
| <b>Lake Ampiliravao</b>            | Mandrozo                | 44.05 | -17.55 | September | X | 1  | 1   |   |
| <b>Lake Mokotobe</b>               | Mandrozo                | 44.06 | -17.55 | September | X | 1  | 5   |   |
| <b>Lake Nosin'omby</b>             | Mandrozo                | 44.07 | -17.55 | September | X | 1  | 8   |   |
| <b>Lake Betakilotra</b>            | Mandrozo                | 44.04 | -17.54 | September | X | 1  | 10  |   |
| <b>Lake Bemamba</b>                | Bemamba                 | 44.36 | -18.84 | January   | X | 1  | 12  |   |
| <b>Lake Belinta</b>                | Masoarivo               | 44.43 | -19.05 | January   | X | 1  | 10  | X |
| <b>Lake Besitera</b>               | Masoarivo               | 44.35 | -19.04 | January   | X | 1  | 4   |   |
| <b>Lake Ranovorindagory</b>        | Soatanimbary            | 45.54 | -20.13 | July      |   | 1  | 3   |   |
| <b>Lake Ambariratabe</b>           | Soatanimbary            | 44.79 | -20.42 | July      |   | 1  | 4   |   |
| <b>Lake Berano (Manamby)</b>       | Mahabo                  | 44.79 | -20.41 | July      |   | 1  | 2   |   |
| <b>Lake Belalitra</b>              | Malaimbandy             | 45.62 | -20.34 | July      |   | 1  | 8   | X |
| <b>Lake Allée de Baobab</b>        | Morondava               | 44.41 | -20.26 | June      | X | 1  | 2   | X |
| <b>Lake Andramagnokely</b>         | Ihotry                  | 43.59 | -21.89 | August    | X | 1  | 23  |   |
| <b>Total</b>                       |                         |       |        |           |   | 22 | 135 |   |

**Table S2:** Location of 11 lakes (Mandrozo New Protected Area [NAP] includes lakes Mandrozo and Andranovaobe) where repeated wetland bird surveys took place in Madagascar, conducted by The Peregrine Fund and the Durrell Wildlife Conservation Trust

| <b>Lake</b>                       | <b>Longitude</b> | <b>Latitude</b> |
|-----------------------------------|------------------|-----------------|
| <b>Lake Antsamaky</b>             | 44.36            | -19.04          |
| <b>Lake Ankerika</b>              | 44.45            | -19.02          |
| <b>Lake Bemamba</b>               | 44.36            | -18.84          |
| <b>Lake Belinta</b>               | 44.43            | -19.05          |
| <b>Lake Andranovorilava South</b> | 49.73            | -12.8           |
| <b>Lake Antohale</b>              | 44.57            | -19.12          |
| <b>Soatana</b>                    | 44.4857          | -19.069         |
| <b>Mandrozo NAP</b>               | 44.09            | -17.55          |
| <b>Lake Soamalipo</b>             | 44.4052          | -19.045         |
| <b>Allee du baobab</b>            | 44.4379          | -20.229         |

**Table S3:** Madagascar *Jacana Actophilornis albinucha* presence records from wetland bird surveys conducted by The Peregrine Fund (pale grey), the Durrell Wildlife Conservation Trust (dark grey), and the present study (bold font) in 10 areas of Madagascar (see Table S1) between 2001 and 2016

| Year | Bemamba | Mandrozo<br>NAP | Antsohale | Baobab | Andranolava<br>South | Soatana | Belinta | Soamalipo | Antsamaky | Ankerika |
|------|---------|-----------------|-----------|--------|----------------------|---------|---------|-----------|-----------|----------|
| 2001 | —       | —               | —         | —      | —                    | —       | —       | —         | 1         | —        |
| 2002 | 6       | —               | —         | —      | —                    | —       | —       | —         | —         | —        |
| 2003 | 37      | —               | —         | —      | —                    | —       | —       | —         | 110       | —        |
| 2004 | 6       | —               | —         | —      | 4                    | —       | —       | —         | 6         | —        |
| 2005 | 21      | —               | —         | 20     | 8                    | —       | —       | —         | 16        | —        |
| 2006 | 9       | —               | —         | —      | —                    | —       | —       | —         | —         | —        |
| 2007 | —       | —               | —         | —      | —                    | —       | —       | —         | —         | —        |
| 2008 | —       | —               | —         | —      | —                    | —       | —       | —         | —         | —        |
| 2009 | —       | 87              | —         | —      | —                    | —       | —       | —         | —         | —        |
| 2010 | —       | 127             | —         | —      | —                    | —       | —       | —         | —         | —        |
| 2011 | —       | 112             | —         | —      | —                    | —       | —       | —         | —         | —        |
| 2012 | —       | 97              | —         | —      | —                    | —       | —       | —         | —         | —        |
| 2013 | 8       | 87              | 6         | —      | —                    | 4       | 2       | 2         | 0         | 6        |
| 2014 | 0       | 107             | 0         | —      | —                    | 0       | 2       | 2         | 0         | 7        |
| 2015 | 0       | 100             | 0         | —      | —                    | 0       | 4       | 0         | 2         | 7        |
| 2016 | 12      | 24              | —         | 2      | 0                    | —       | 10      | —         | 0         | 0        |

**Table S4:** Morphometric measurements (tarsus length, wing length, and mass) of adult Madagascar Jacana. Normally distributed data were compared with a two-sample *t*-test, whereas Wilcoxon rank-sum tests were performed for non-normally distributed data. Sexual size dimorphism was calculated as  $\log(\text{Male/Female})$  following the method of Székely et al. (2007). SD = standard deviation; *n* = number of individuals included in the comparison; df = degrees of freedom

|                                      | Tarsus length (mm) |         | Wing length (mm) |         | Mass (g) |         |
|--------------------------------------|--------------------|---------|------------------|---------|----------|---------|
|                                      | Males              | Females | Males            | Females | Males    | Females |
| Min.                                 | 62.7               | 64.3    | 139              | 180     | 145      | 240     |
| Max.                                 | 71.0               | 80.1    | 167              | 190     | 185      | 285     |
| Mean                                 | 66.8               | 72.5    | 161.0            | 185.7   | 166.6    | 266.2   |
| SD                                   | 2.64               | 5.54    | 6.86             | 3.63    | 14.70    | 18.87   |
| <i>n</i>                             | 22                 | 13      | 22               | 13      | 8        | 4       |
| <i>t</i> -test or <i>W</i> statistic | 3.46               |         | 264*             |         | 10.13    |         |
| <i>p</i> -value                      | 0.003              |         | <0.001           |         | <0.001   |         |
| df                                   | 15.29              |         | NA               |         | 10       |         |
| log(Male/Female)                     | −0.036             |         | −0.062           |         | −0.204   |         |
| Female : Male ratio                  | 1.09 : 1           |         | 1.15 : 1         |         | 1.60 : 1 |         |
| *Wilcoxon rank-sum test              |                    |         |                  |         |          |         |

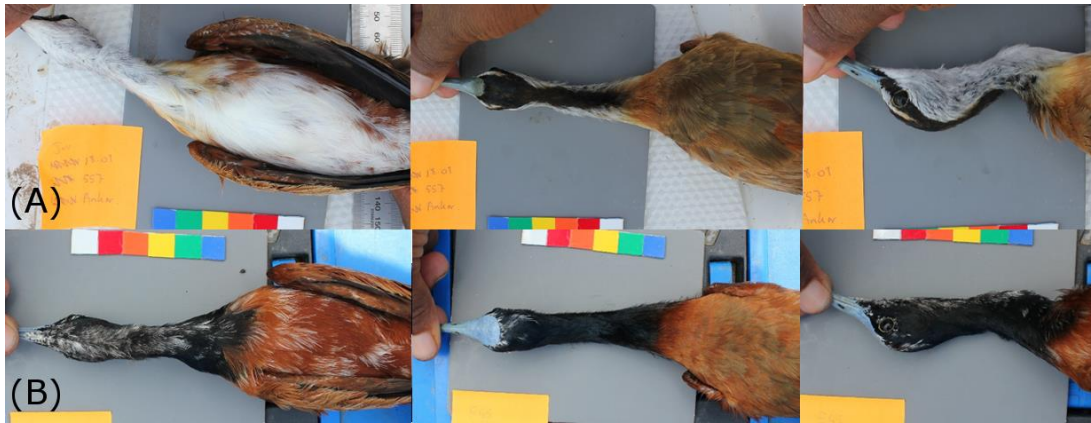

**Figure S1:** Photographs showing plumage variation in immatures of Madagascar Jacana *Actophilornis albinucha*; (row A) immature plumage and (row B) intermediate plumage between the immature and adult stages. Both plumage types were considered immature for our survey records

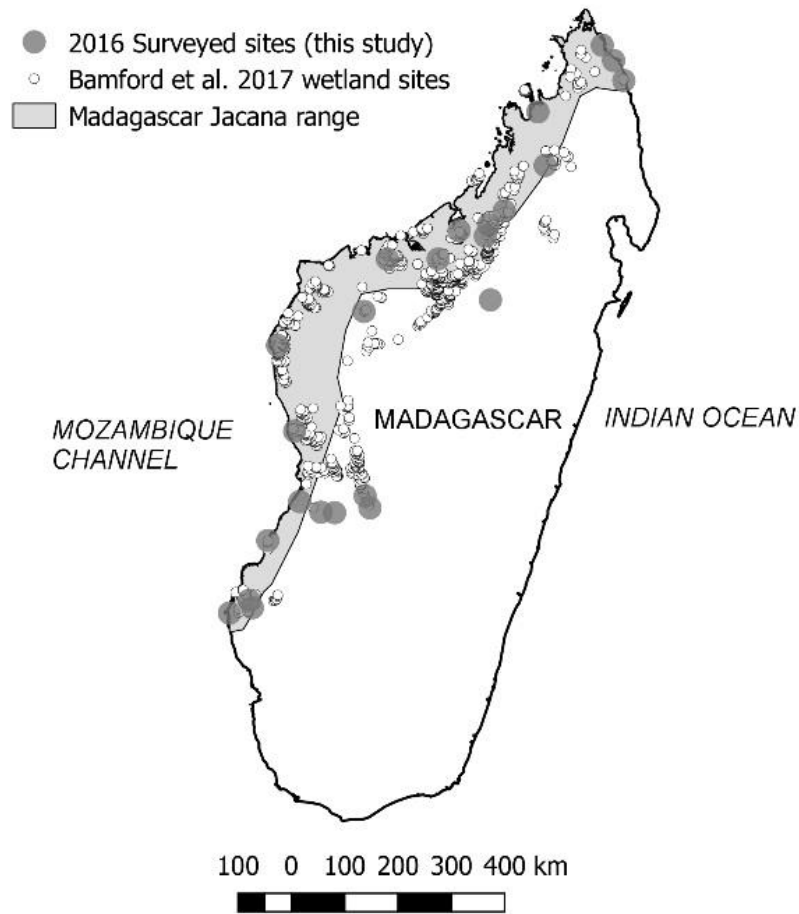

**Figure S2:** Map showing Madagascar wetland locations (small circles) that were included to estimate the population size of Madagascar Jacana *Actophilornis albinucha*. Grey dots are the location of sites surveyed for Madagascar Jacana during 2016. Shading indicates the predicted range of Madagascar Jacana (BirdLife International 2016)



(A)

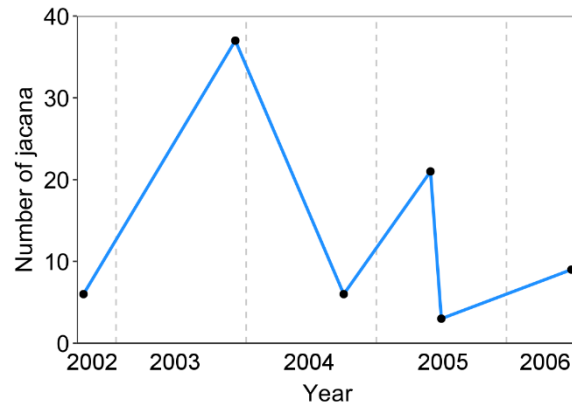

(B)

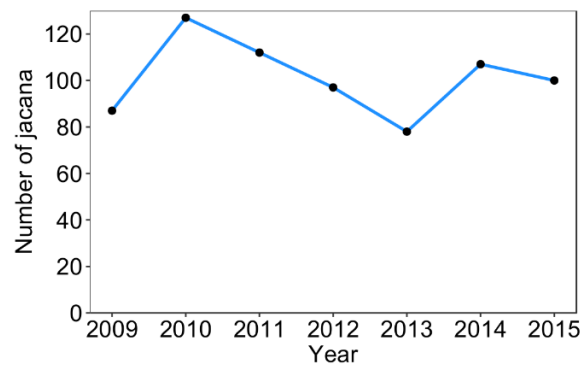

**Figure S3:** The number of Madagascar Jacana *Actophilornis albinucha* recorded from repeated wetland bird surveys conducted at (A) Lake Bemamba (by the Durrell Wildlife Conservation Trust), with dotted lines indicating the year boundaries; and at (B) Mandrozo New Protected Area (by The Peregrine Fund), but no dates were associated with those surveys

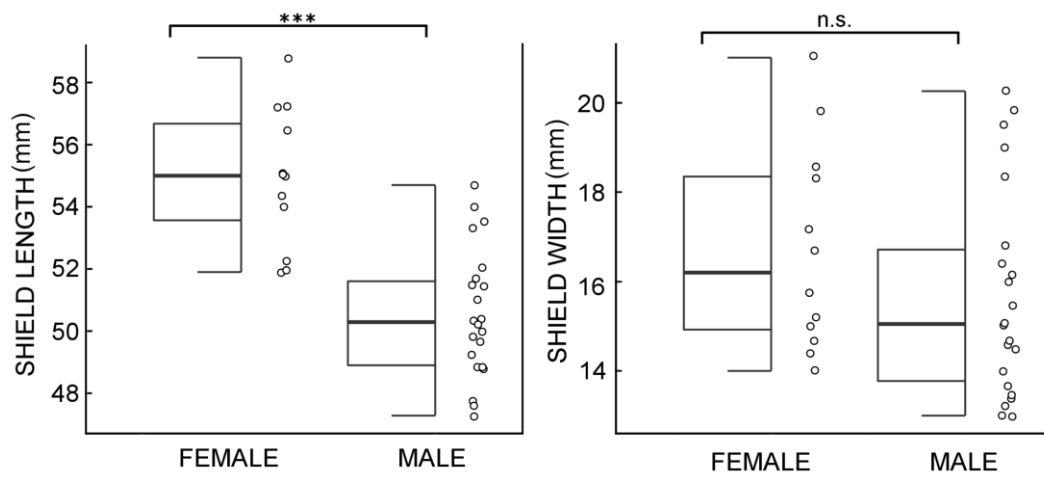

**Figure S4:** Shield lengths (including bill and shield width) in males and females of Madagascar

*Jacana Actophilornis albinucha*. \*\*\* =  $p < 0.001$

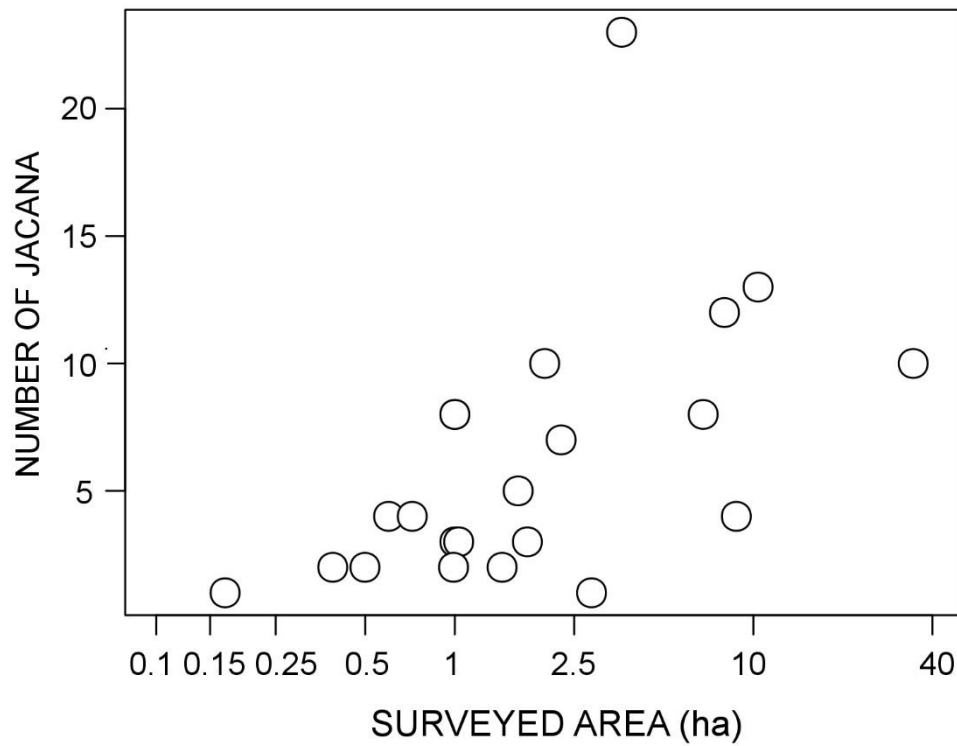

**Figure S5:** Relationship between the surveyed area (hectares) per lake ( $n = 22$  lakes, log-transformed data) and the total number of Madagascar Jacana *Actophilornis albinucha* individuals present within that lake
